# Supplementary material for: Ligand steric effects on α-diimine nickel catalyzed ethylene and 1-hexene polymerization
Source: Royal Society of Chemistry journal article supplement (doi:10.1039/c7ra11783c), 2017-01-01
Supplement: c7ra11783c1.pdf [file c7ra11783c1.pdf]

Supporting Information

**Ligand Steric Effects on  $\alpha$ -Diimine Nickel Catalyzed Ethylene and  
1-Hexene Polymerization**

Jinlong Sun,<sup>a</sup> Fuzhou Wang,<sup>\*ab</sup> Weimin Li<sup>a</sup> and Min Chen<sup>\*a</sup>

<sup>a</sup> Advanced Catalysis and Green Manufacturing Collaborative Innovation Center, School of Petrochemical Engineering, Changzhou University, Changzhou 213164, China.

<sup>b</sup> Graduate School of Engineering, Hiroshima University, Kagamiyama 1-4-1, Higashi-Hiroshima 739-8527, Japan.

\*Correspondence to: F. Z. Wang (E-mail: wangfuzhou1718@126.com)

M. Chen (E-mail: misschen@ustc.edu.cn)

**Contents**

**1. Synthesis and Characterization**

1.1. Synthesis of  $\alpha$ -diimine ligands **L1–L6** and complexes **1–6**

1.2. NMR spectrum of the ligands **L2–L6**

**2. X-ray Structure Determination**

**3. Microstructure Analysis of Polymer**

3.1. Equations for the microstructure analysis of the polymers

3.2. <sup>1</sup>H and <sup>13</sup>C NMR spectrum of polyethylenes

3.2. <sup>1</sup>H and <sup>13</sup>C NMR spectrum of poly(1-hexene)s

**4. GPC Curves for the Polyethylenes**

**5. References**

## 1. Synthesis and Characterization

### 1.1. Synthesis of $\alpha$ -diimine ligands **L1–L6** and complexes **1–6**

The desired ligands were prepared by the Schiff base condensation using *p*-toluenesulfonic acid (*p*-TsOH) as catalyst in high yields (**Scheme S1**). All  $\alpha$ -diimine ligands **L1–L6** were characterized by elemental analysis,  $^1\text{H}$  NMR and  $^{13}\text{C}$  NMR. Complexes **1–6** were synthesized from the reactions of the corresponding ligand with  $(\text{DME})\text{NiBr}_2$  in high yields. These complexes were characterized by IR spectroscopy and elemental analysis.

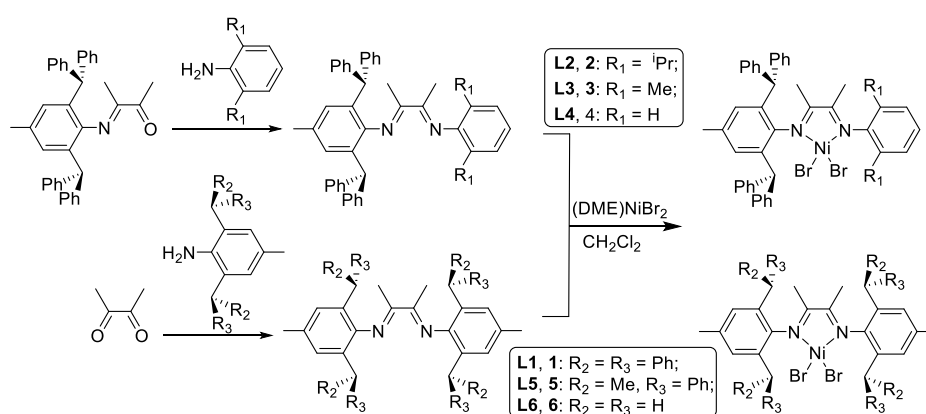

**Scheme S1.** Synthesis of  $\alpha$ -diimine ligands **L1–L6** and their complexes **1–6**.

All  $\alpha$ -diimine ligands **L1–L6**<sup>[1–4]</sup>, {bis[*N,N'*-(4-methyl-2,6-dibenzhydrylphenyl)imino]-2,3-butadiene} dibromidonickel **1**<sup>[2]</sup>, {bis[*N,N'*-(4-methyl-2,6-di-*sec*-phenylethylphenyl)imino]-2,3-butadiene} dibromidonickel **5**<sup>[4]</sup> and {bis[*N,N'*-(2,4,6-trimethylphenyl)imino]-2,3-butadiene} dibromidonickel **6**<sup>[4]</sup> were synthesized according to the literature.

### 1.2. NMR spectrum of the ligands **L2–L6**

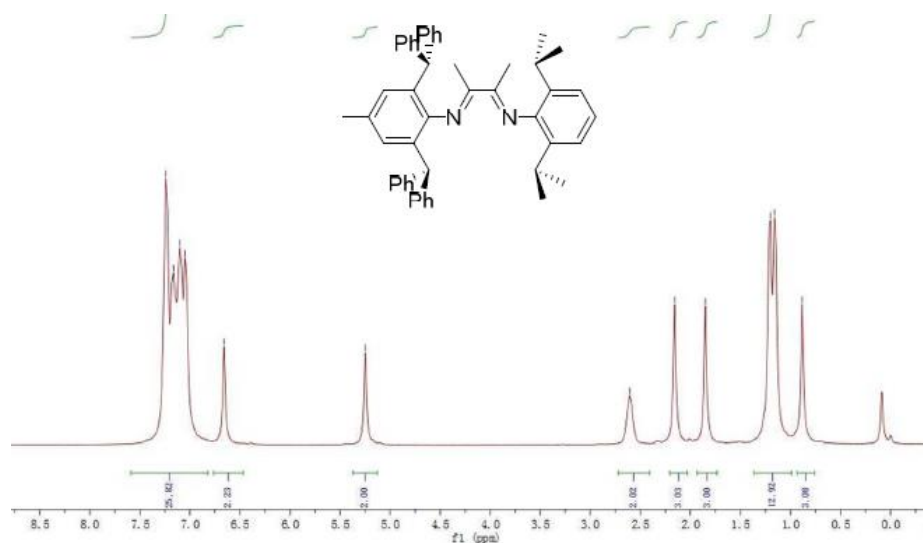

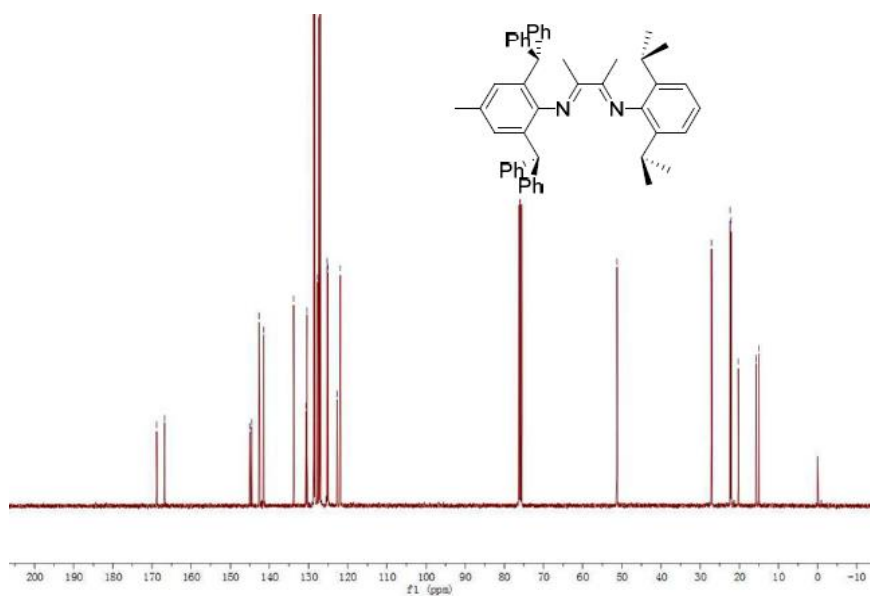

**Fig. S1.**  $^1\text{H}$  and  $^{13}\text{C}$  NMR spectrum of ligand L2.

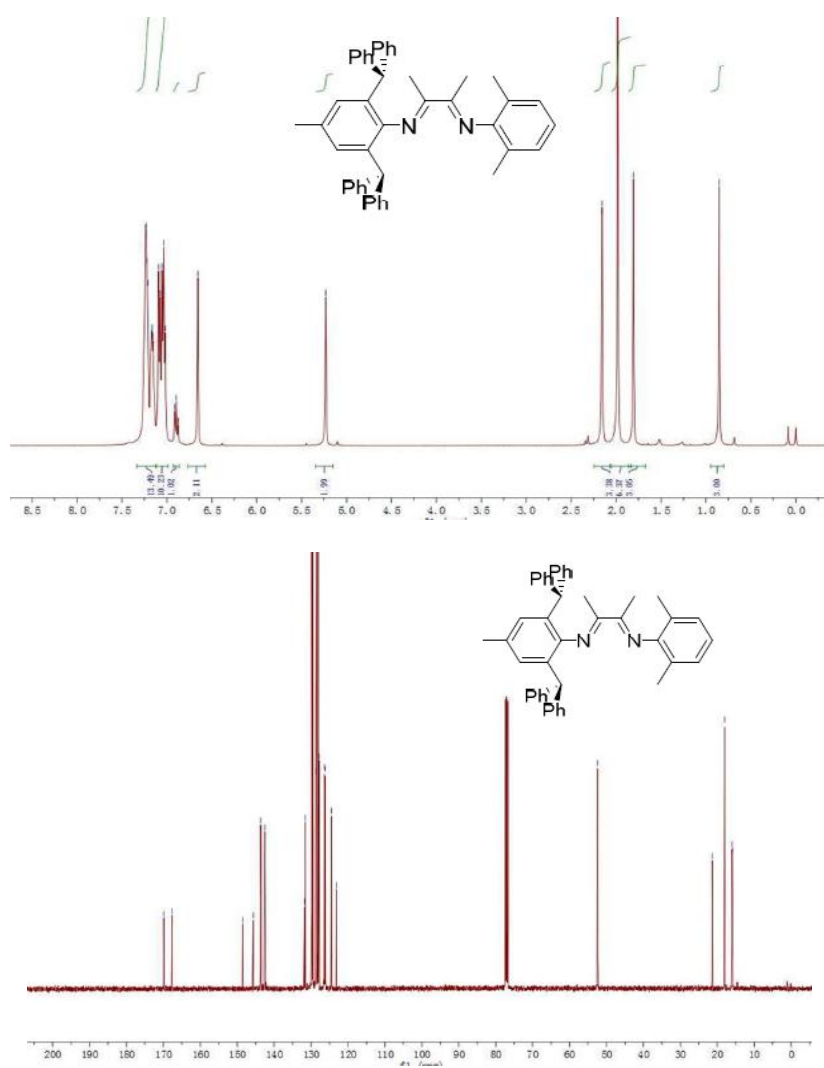

**Fig. S2.**  $^1\text{H}$  and  $^{13}\text{C}$  NMR spectrum of ligand L3.

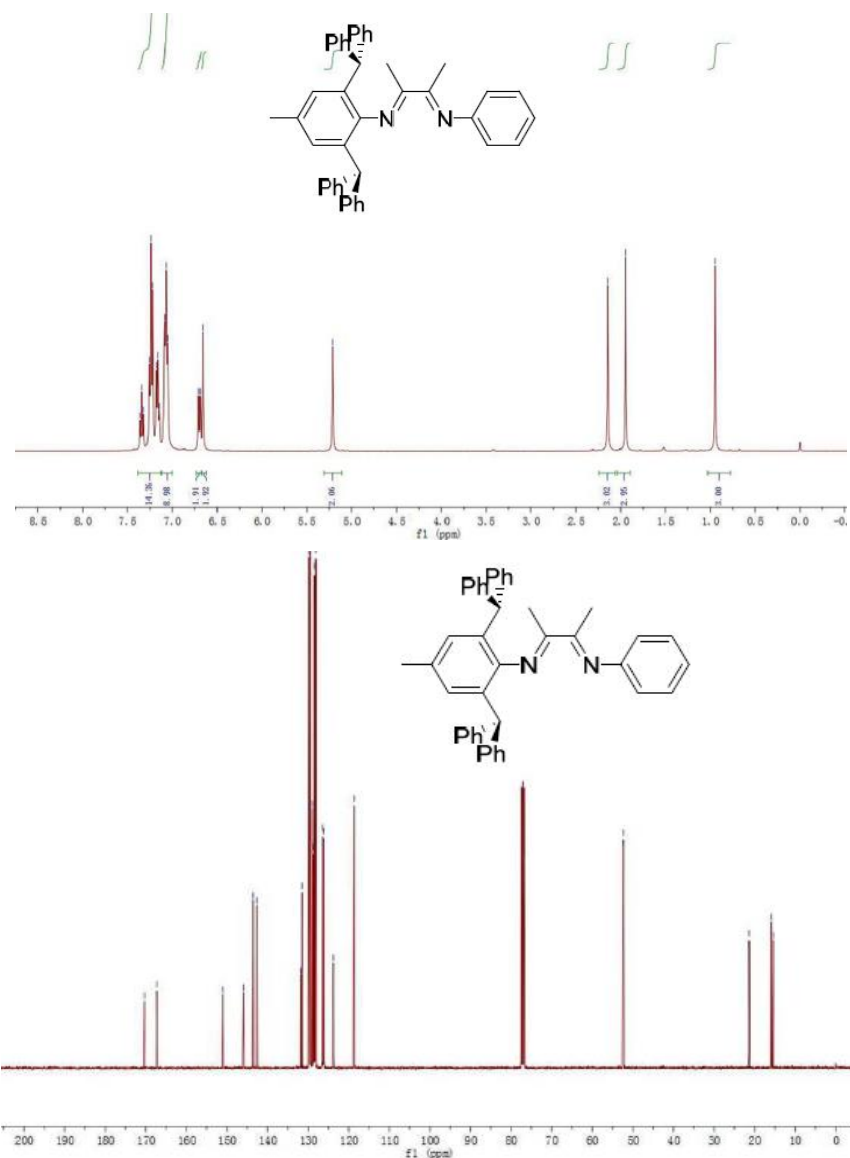

**Fig. S3.**  $^1\text{H}$  and  $^{13}\text{C}$  NMR spectrum of ligand L4.

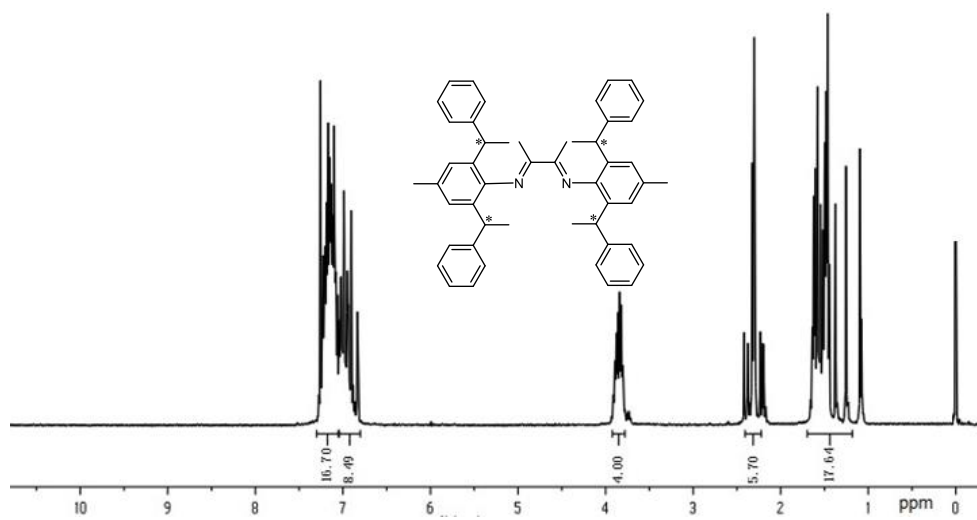

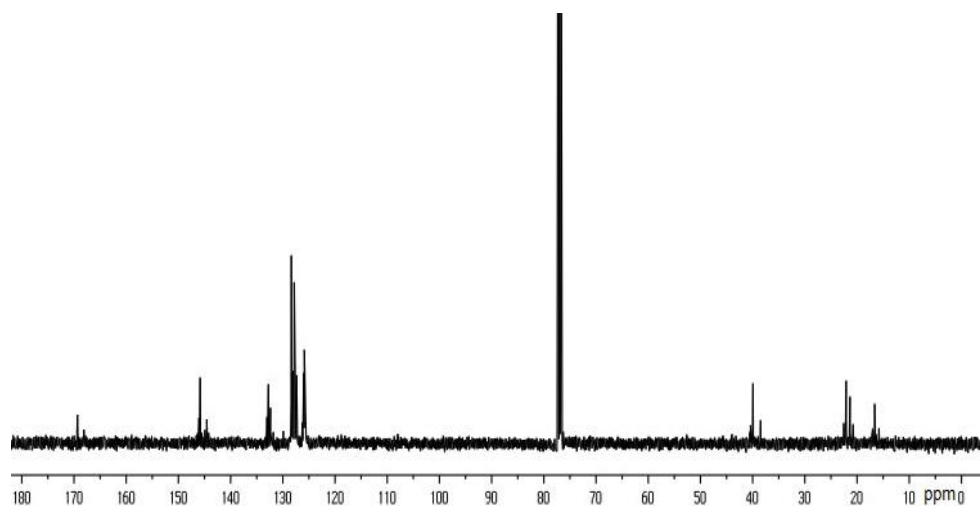

**Fig. S4.**  $^1\text{H}$  and  $^{13}\text{C}$  NMR spectrum of ligand **L5**.

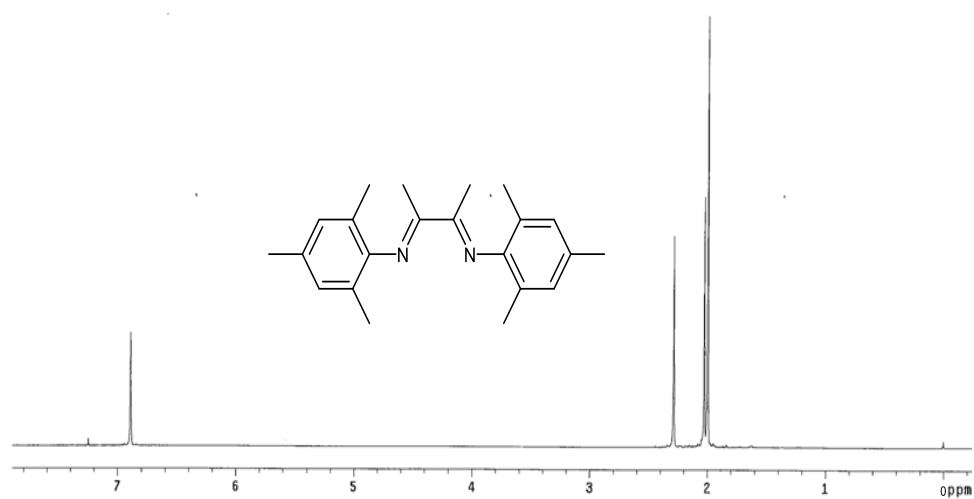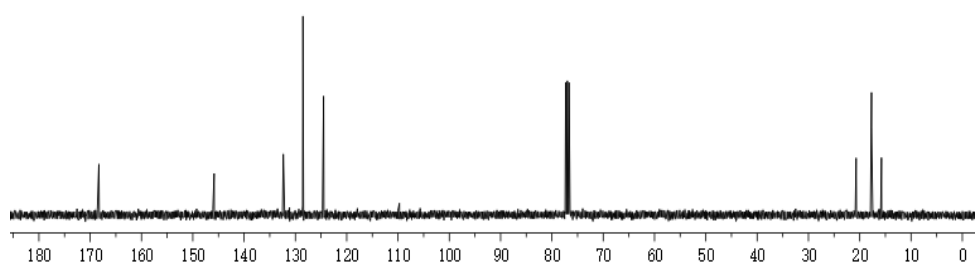

**Fig. S5.**  $^1\text{H}$  and  $^{13}\text{C}$  NMR spectrum of ligand **L6**.

## 2. X-ray structure determination

**Table S1** Crystal Data and Structure Refinement for complexes **2**, **3** and **5**

| Complex                                             | <b>2</b>                                                          | <b>3</b>                                                          | <b>5</b>                                                                       |
|-----------------------------------------------------|-------------------------------------------------------------------|-------------------------------------------------------------------|--------------------------------------------------------------------------------|
| Empirical Formula                                   | C <sub>49</sub> H <sub>49</sub> Br <sub>2</sub> N <sub>2</sub> Ni | C <sub>45</sub> H <sub>42</sub> Br <sub>2</sub> N <sub>2</sub> Ni | C <sub>50</sub> H <sub>42</sub> Br <sub>2</sub> N <sub>2</sub> Ni <sub>2</sub> |
| Formula mass                                        | 884.43                                                            | 829.34                                                            | 899.47                                                                         |
| Temperature (K)                                     | 298                                                               | 298                                                               | 293                                                                            |
| Wavelength (Å)                                      | 0.71073                                                           | 0.71073                                                           | 0.71073                                                                        |
| Crystal size (mm <sup>3</sup> )                     | 0.26 × 0.15 × 0.12                                                | 0.27 × 0.10 × 0.05                                                | 0.24 × 0.21 × 0.06                                                             |
| Crystal system                                      | Monoclinic                                                        | Monoclinic                                                        | Monoclinic                                                                     |
| Space group                                         | P2 <sub>1</sub> /c                                                | P2 <sub>1</sub> /n                                                | P2/a                                                                           |
| <i>a</i> (Å)                                        | 25.465 (2)                                                        | 9.1819 (9)                                                        | 22.4157 (8)                                                                    |
| <i>b</i> (Å)                                        | 17.0368 (17)                                                      | 23.1568 (19)                                                      | 8.5771 (3)                                                                     |
| <i>c</i> (Å)                                        | 22.342 (2)                                                        | 19.0157 (16)                                                      | 24.0509 (8)                                                                    |
| <i>V</i> (Å <sup>3</sup> )                          | 8716.6 (14)                                                       | 3962.1 (6)                                                        | 4215.0 (2)                                                                     |
| <i>Z</i>                                            | 8                                                                 | 4                                                                 | 4                                                                              |
| Density (calcd.) (mg/cm <sup>3</sup> )              | 1.348                                                             | 1.390                                                             | 1.417                                                                          |
| Absorption coefficient (mm <sup>-1</sup> )          | 2.31                                                              | 2.539                                                             | 3.15                                                                           |
| <i>F</i> (000)                                      | 3640                                                              | 1696                                                              | 1856                                                                           |
| Theta range for data collec. (°)                    | 2.4–23.9                                                          | 2.4–28.8                                                          | 3.7–72.7                                                                       |
| Limiting indices                                    | –30 ≤ <i>h</i> ≤ 30<br>–20 ≤ <i>k</i> ≤ 20<br>–26 ≤ <i>l</i> ≤ 26 | –10 ≤ <i>h</i> ≤ 10<br>–27 ≤ <i>k</i> ≤ 27<br>–11 ≤ <i>l</i> ≤ 22 | –27 ≤ <i>h</i> ≤ 16<br>–10 ≤ <i>k</i> ≤ 10<br>–28 ≤ <i>l</i> ≤ 29              |
| No. of rflns collected                              | 15356                                                             | 18723                                                             | 14743                                                                          |
| No. unique rflns [R(int)]                           | 7209                                                              | 6939                                                              | 7775                                                                           |
| <i>R</i> <sub>int</sub>                             | 0.000                                                             | 0.155                                                             | 0.029                                                                          |
| Final <i>R</i> indices [ <i>I</i> > 2σ( <i>I</i> )] | <i>R</i> <sub>1</sub> = 0.1324<br><i>wR</i> <sub>2</sub> = 0.3405 | <i>R</i> <sub>1</sub> = 0.1136<br><i>wR</i> <sub>2</sub> = 0.2199 | <i>R</i> <sub>1</sub> = 0.0823<br><i>wR</i> <sub>2</sub> = 0.1875              |
| <i>R</i> indices (all data)                         | <i>R</i> <sub>1</sub> = 0.1844<br><i>wR</i> <sub>2</sub> = 0.3770 | <i>R</i> <sub>1</sub> = 0.2249<br><i>wR</i> <sub>2</sub> = 0.2418 | <i>R</i> <sub>1</sub> = 0.1146,<br><i>wR</i> <sub>2</sub> = 0.2022             |
| Goodness-of-fit on <i>F</i> <sup>2</sup>            | 1.132                                                             | 1.098                                                             | 1.26                                                                           |
| Max. and min. transmission                          | 0.7688 and 0.5846                                                 | 0.8835 and 0.5472                                                 | 1.000 and 0.644                                                                |
| Largest diff. peak and hole (e.Å <sup>-3</sup> )    | 2.87 and –3.64                                                    | 0.89 and –1.34                                                    | 0.62 and –0.71                                                                 |

### 3. Microstructure Analysis of Polymer

#### 3.1. Equations for the microstructure analysis of the polymers

##### Calculation of the degree of branching

The degree of branching was estimated by  $^1\text{H}$  NMR spectroscopy and was corrected for end groups as follows <sup>[5]</sup>:

$$B = \frac{2(I_{\text{CH}_3})}{3(I_{\text{CH}} + I_{\text{CH}_2} + I_{\text{CH}_3})} \times 1000 \quad \text{S1}$$

Branching degree, the number of methyl carbon in every 1000 carbons,  $\text{CH}_3$ ,  $\text{CH}_2$ ,  $\text{CH}$  refer to the intensities of the methyl, methylene and methine resonances in  $^1\text{H}$  NMR spectra.  $\text{CH}_3$  (alkyl methyl, alk- $\text{CH}_3$ , m, 0.70–0.95 ppm),  $\text{CH}_2$  and  $\text{CH}$  (alk- $\text{CH}$  and alk- $\text{CH}_2$ , m, ca. 1.00–1.45 ppm) refer to the intensities of the methyl, methylene and methine resonances in  $^1\text{H}$  NMR spectra.

Assignments of the  $^{13}\text{C}$  NMR spectra and equations for the quantitative analysis of the polyolefins under investigation, according to **equation S2** reported by Azoulay et al. <sup>[6]</sup>. Chemical shift and assignment of the peak listed in the **Table S2** are marked in the spectrum (**Fig. S6**).

$$\begin{aligned} \text{CH}_3 &= (I_2 + I_5)/2 + I_1 + I_3 + I_6 \\ \text{Methyl branch, Me} &= I_6 - I_4 + I_7; \text{ Ethyl branch, Et} = (I_1 + I_{10})/2 \\ \text{Propyl branch, Pr} &= (I_4 + I_{23})/2; \text{ Butyl branch, Bu} = I_3 - I_8 \\ \text{sec-Butyl branch, } ^s\text{Bu} &= (I_2 + I_5)/2; \text{ Longer branch, Lg} = (I_8 + I_{17})/2 \end{aligned} \quad \text{S2}$$

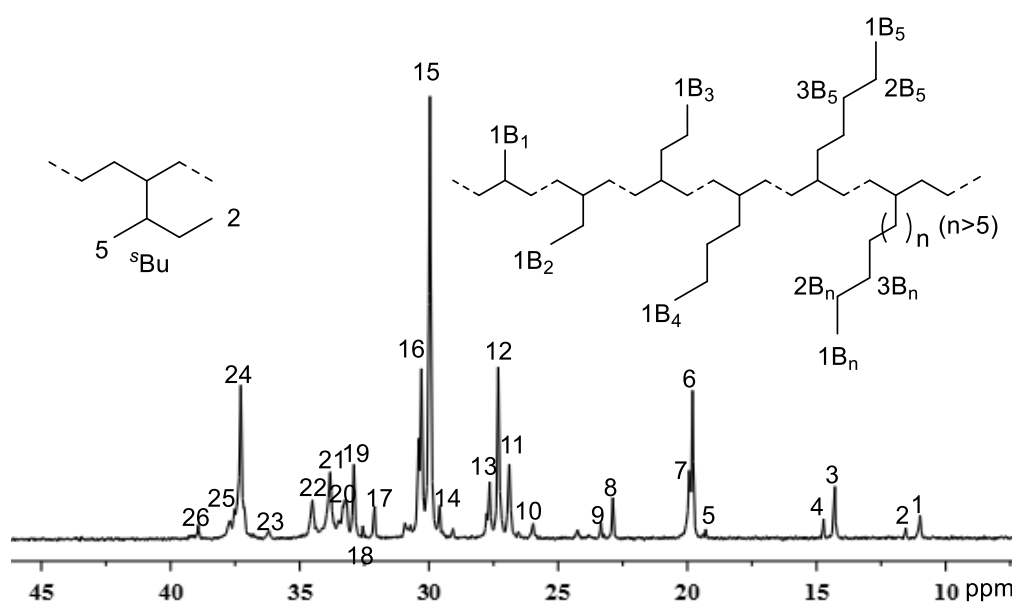

**Fig. S6.**  $^{13}\text{C}$  NMR spectrum of the polyethylene obtained by complex **1** at 80 °C (entry 15, **Table 2**).

**Table S2.** Chemical shift and assignment of peaks.<sup>a</sup>

| Peak No. | Chemical shift (ppm) | Assignment                        | Peak No. | Chemical shift (ppm) | Assignment                                         |
|----------|----------------------|-----------------------------------|----------|----------------------|----------------------------------------------------|
| 1        | 11.09                | 1B <sub>2</sub>                   | 14       | 29.61                | 4B <sub>n</sub>                                    |
| 2        | 11.53                | <sup>o</sup> Bu                   | 15       | 29.95                | CH <sub>2</sub>                                    |
| 3        | 14.25                | 1B <sub>4</sub> , 1B <sub>n</sub> | 16       | 30.36                | $\gamma$ B <sub>1</sub> , $\gamma$ B <sub>2+</sub> |
| 4        | 14.66                | 1B <sub>3</sub>                   | 17       | 32.09                | 3B <sub>n</sub>                                    |
| 5        | 19.33                | <sup>o</sup> Bu                   | 18       | 32.57                | 3B <sub>5</sub>                                    |
| 6        | 19.81                | 1B <sub>1</sub>                   | 19       | 32.94                | brB <sub>1</sub>                                   |
| 7        | 19.98                | 2B <sub>3</sub>                   | 20       | 33.34                | $\alpha$ B <sub>2</sub>                            |
| 8        | 22.85                | 2B <sub>n</sub>                   | 21       | 33.91                | $\alpha$ B <sub>3+</sub>                           |
| 9        | 23.24                | 2B <sub>4</sub>                   | 22       | 34.56                | <i>n</i> B <sub>n</sub>                            |
| 10       | 26.03                | 2B <sub>2</sub>                   | 23       | 36.84                | 3B <sub>3</sub>                                    |
| 11       | 26.95                | ( <i>n</i> -1)B <sub>n</sub>      | 24       | 37.33                | $\alpha$ B <sub>1</sub>                            |
| 12       | 27.30                | $\beta$ B <sub>2+</sub>           | 25       | 37.77                | brB <sub>n</sub>                                   |
| 13       | 27.66                | $\beta$ B <sub>1</sub>            | 26       | 39.03                | brB <sub>2</sub>                                   |

<sup>a</sup> <sup>13</sup>C NMR (CDCl<sub>3</sub>  $\delta$ : 77.16 ppm) measurements of the polyethylene are marked in **Fig. S6**; Note on labels: for *x*B<sub>*n*</sub> B<sub>*n*</sub> is a branch of length *n* carbons, *x* is the carbon being discussed, and the methyl at the end of the branch is numbered 1. Thus, the second carbon from the end of a butyl branch is 2B<sub>4</sub>. *x*B<sub>*n*</sub>+ refers to branches of length *n* and longer.

### 3.2. <sup>1</sup>H and <sup>13</sup>C NMR spectrum of polyethylenes

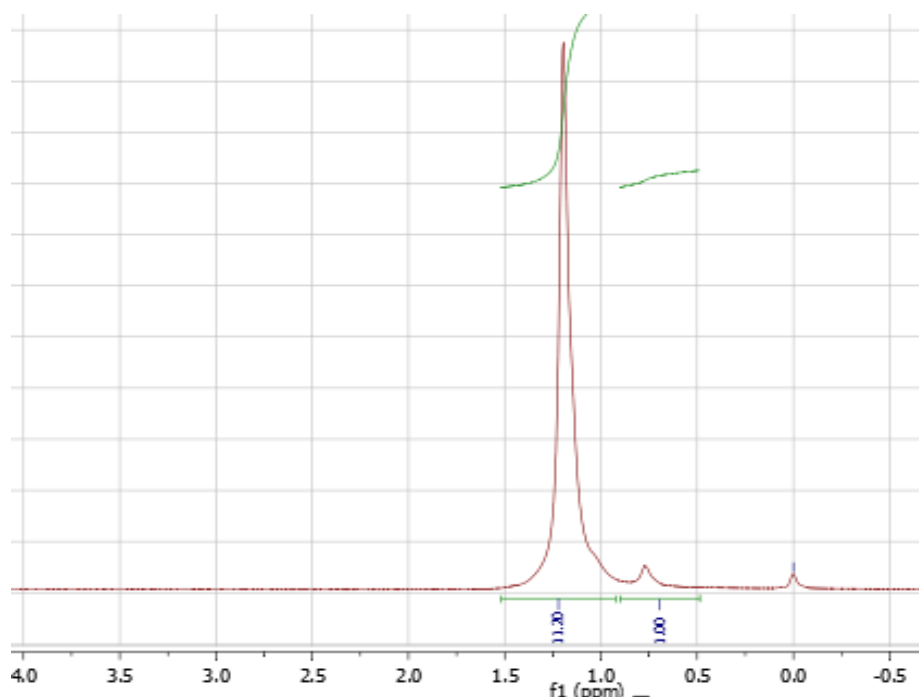

**Fig. S7.** <sup>1</sup>H NMR spectrum of polyethylene obtained by complex **1** at 20 °C from **Table 1**, entry 1 (d<sup>6</sup>-benzene, 60 °C, B = 55).



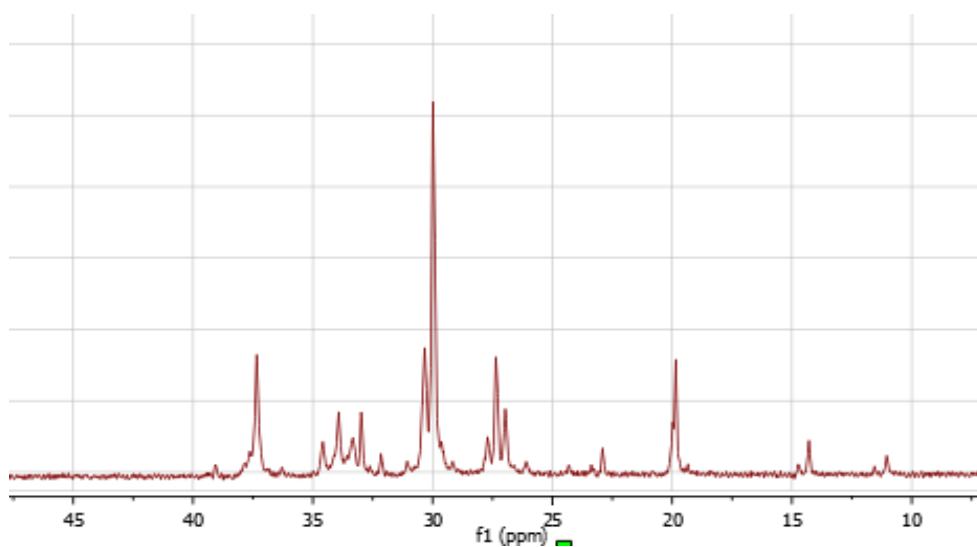

**Fig. S8.**  $^{13}\text{C}$  NMR spectrum of polyethylene obtained by complex **5** at 50 °C from **Table 1**, entry 11 ( $\text{d}^6$ -benzene, 60 °C).

### 3.3. $^1\text{H}$ and $^{13}\text{C}$ NMR spectrum of poly(1-hexene)s

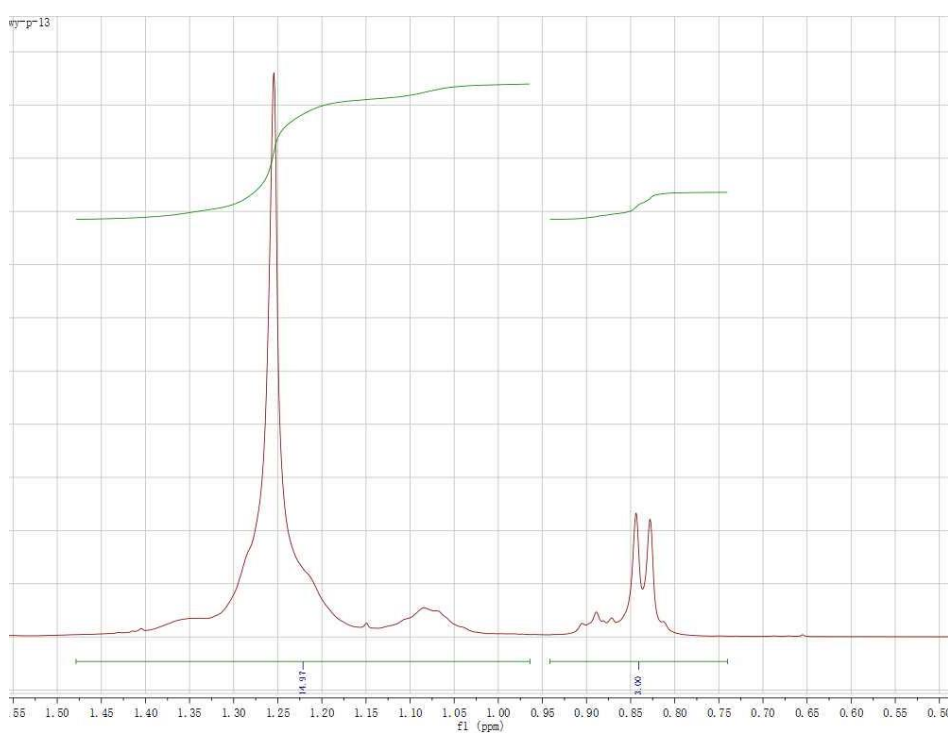

**Fig. S9.**  $^1\text{H}$  NMR spectrum of poly(1-hexene) obtained by complex **1** at 40 °C from **Table 2**, entry 2 ( $\text{d}^6$ -benzene, 60 °C,  $B = 111.3$ ).

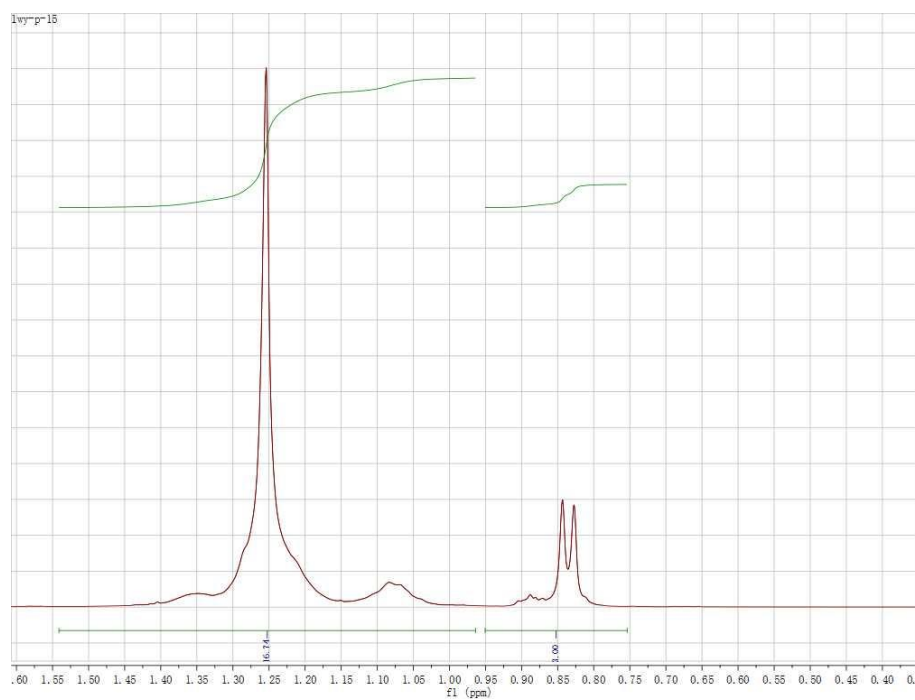

**Fig. S10.**  $^1\text{H}$  NMR spectrum of poly(1-hexene) obtained by complex **1** at 60 °C from **Table 2**, entry 3 ( $d^6$ -benzene, 60 °C, B = 106.7).

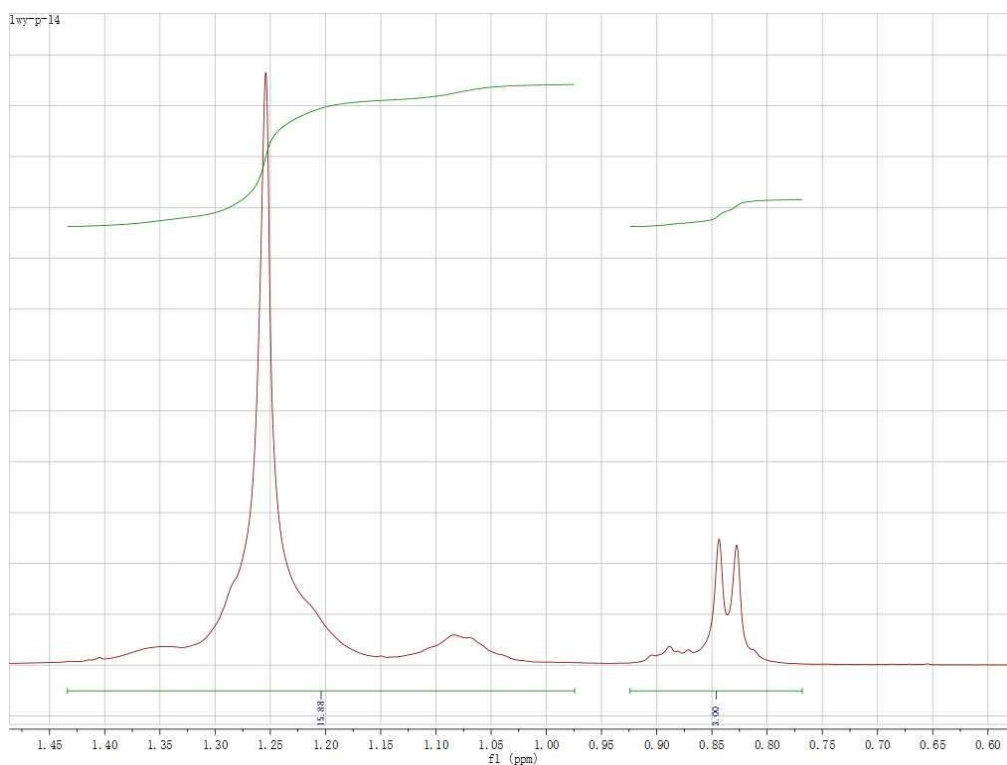

**Fig. S11.**  $^1\text{H}$  NMR spectrum of poly(1-hexene) obtained by complex **1** at 80 °C from **Table 2**, entry 4 ( $d^6$ -benzene, 60 °C, B = 105.9).

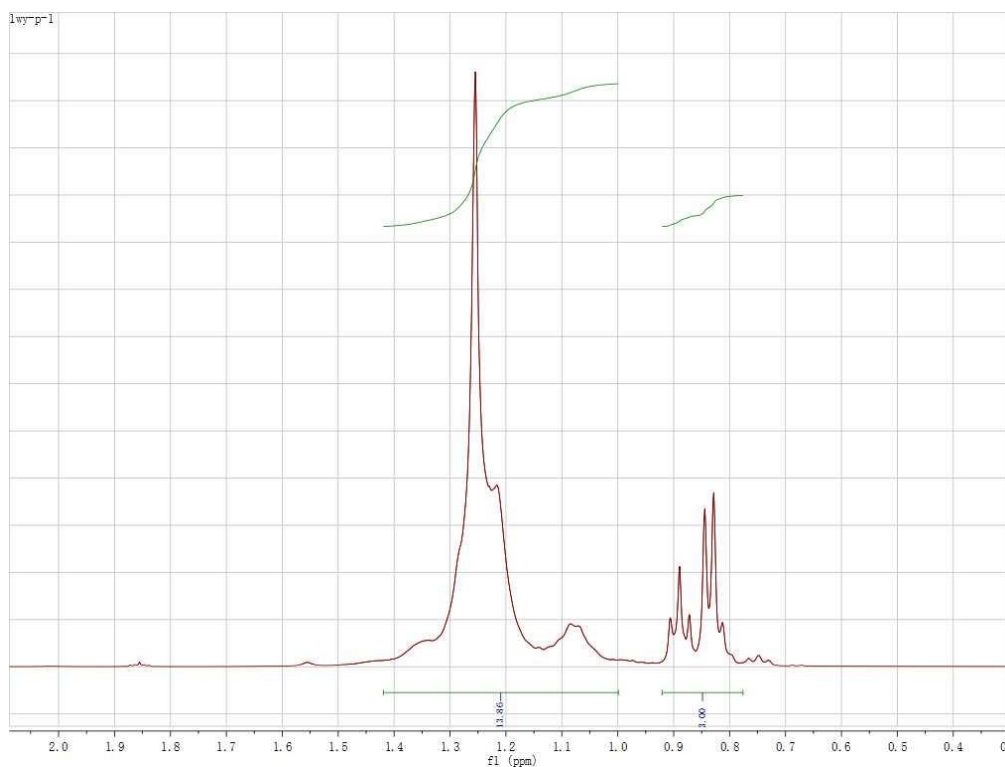

**Fig. S12.** <sup>1</sup>H NMR spectrum of poly(1-hexene) obtained by complex **2** at 20 °C from **Table 2**, entry 5 (d<sup>6</sup>-benzene, 60 °C, B = 118.6).

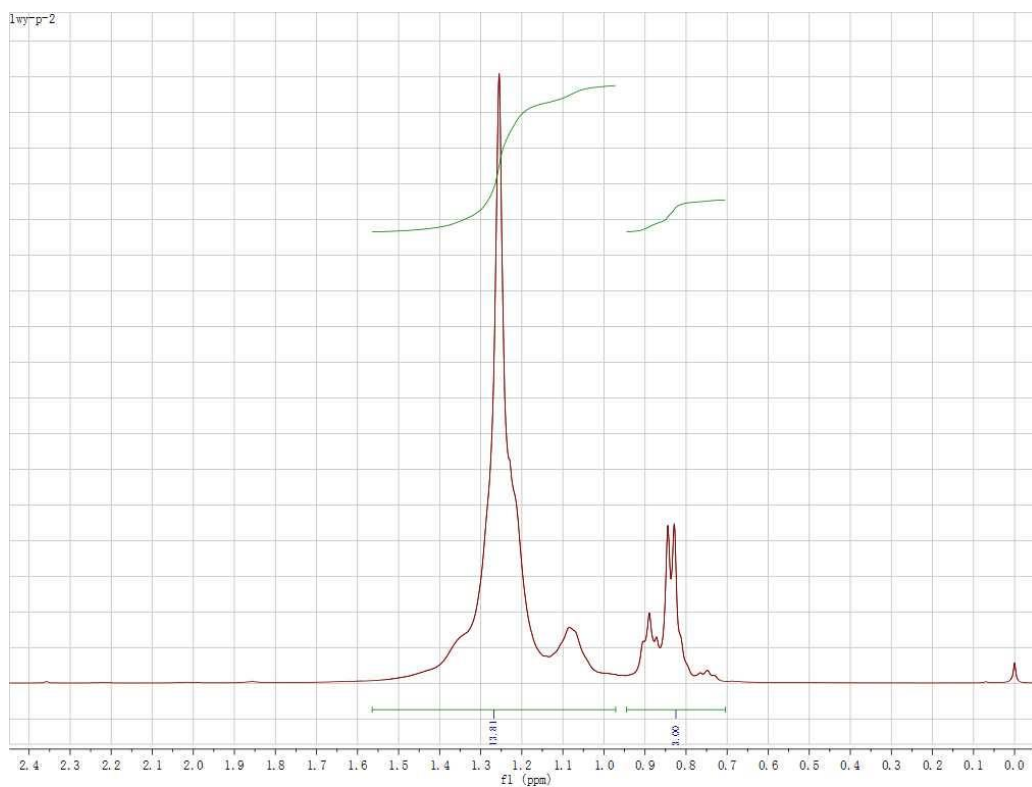

**Fig. S13.** <sup>1</sup>H NMR spectrum of poly(1-hexene) obtained by complex **2** at 40 °C from **Table 2**, entry 6 (d<sup>6</sup>-benzene, 60 °C, B = 119.0).

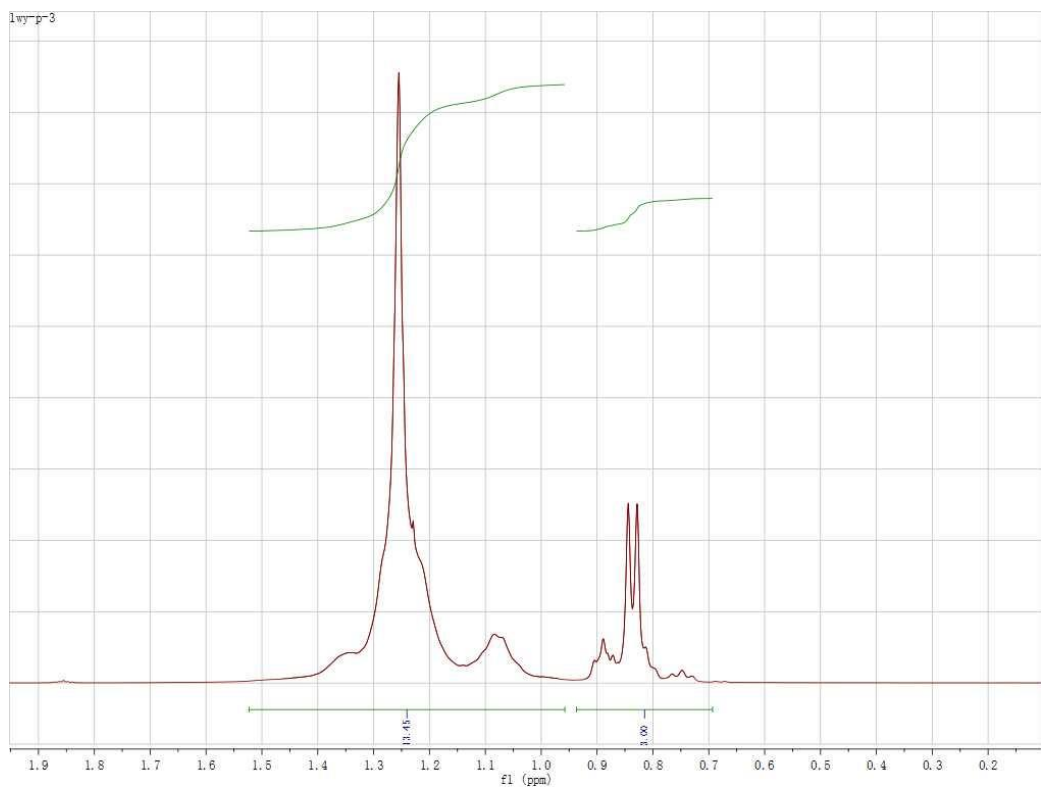

**Fig. S14.**  $^1\text{H}$  NMR spectrum of poly(1-hexene) obtained by complex **2** at 60 °C from **Table 2**, entry 7 ( $d^6$ -benzene, 60 °C, B = 121.6).

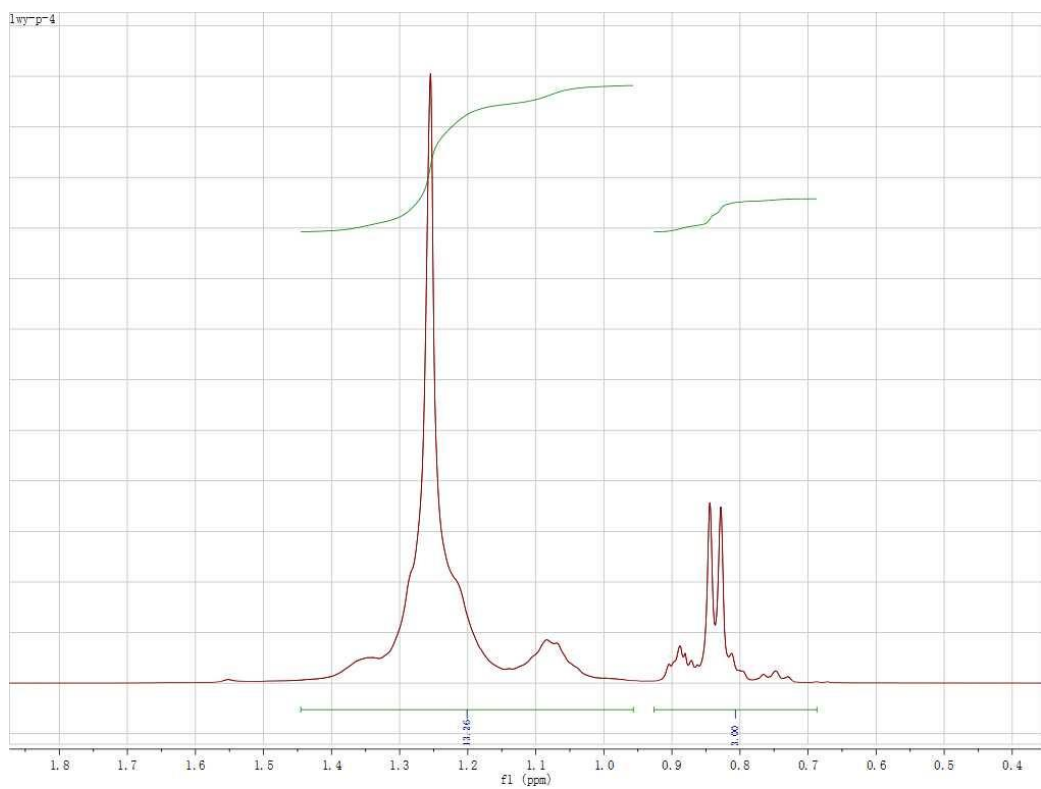

**Fig. S15.**  $^1\text{H}$  NMR spectrum of poly(1-hexene) obtained by complex **2** at 80 °C from **Table 2**, entry 8 ( $d^6$ -benzene, 60 °C, B = 123.0).

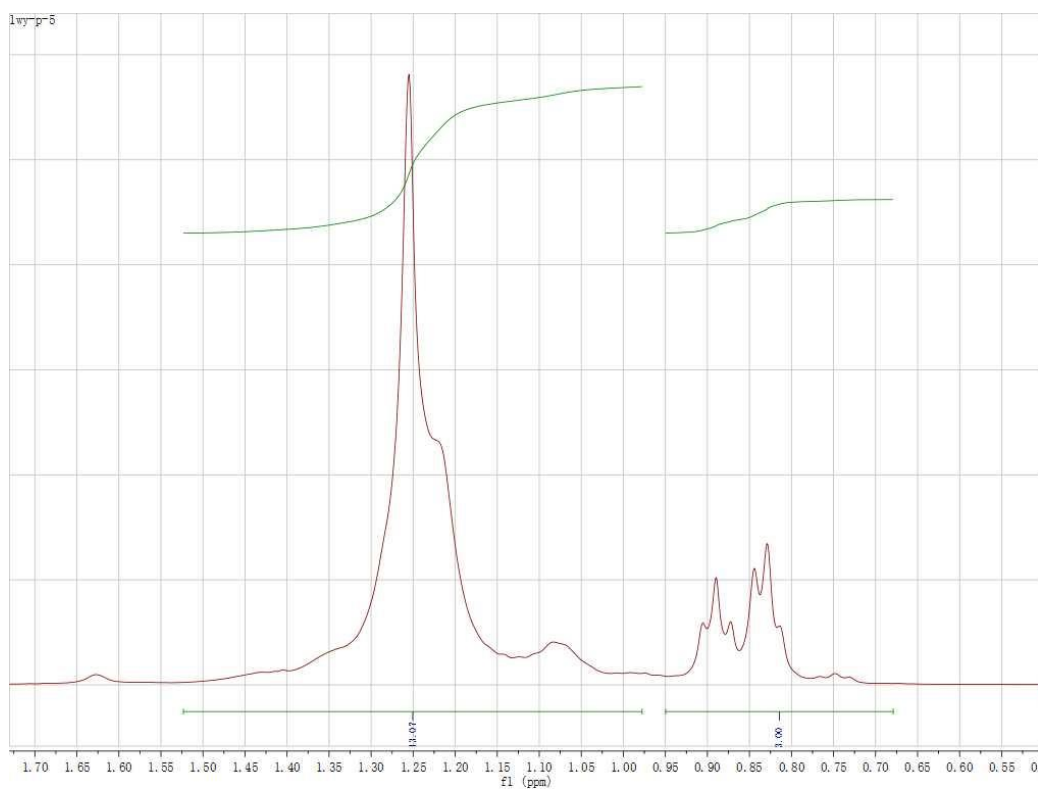

**Fig. S16.**  $^1\text{H}$  NMR spectrum of poly(1-hexene) obtained by complex **3** at 20 °C from **Table 2**, entry 9 ( $d^6$ -benzene, 60 °C, B = 124.5).

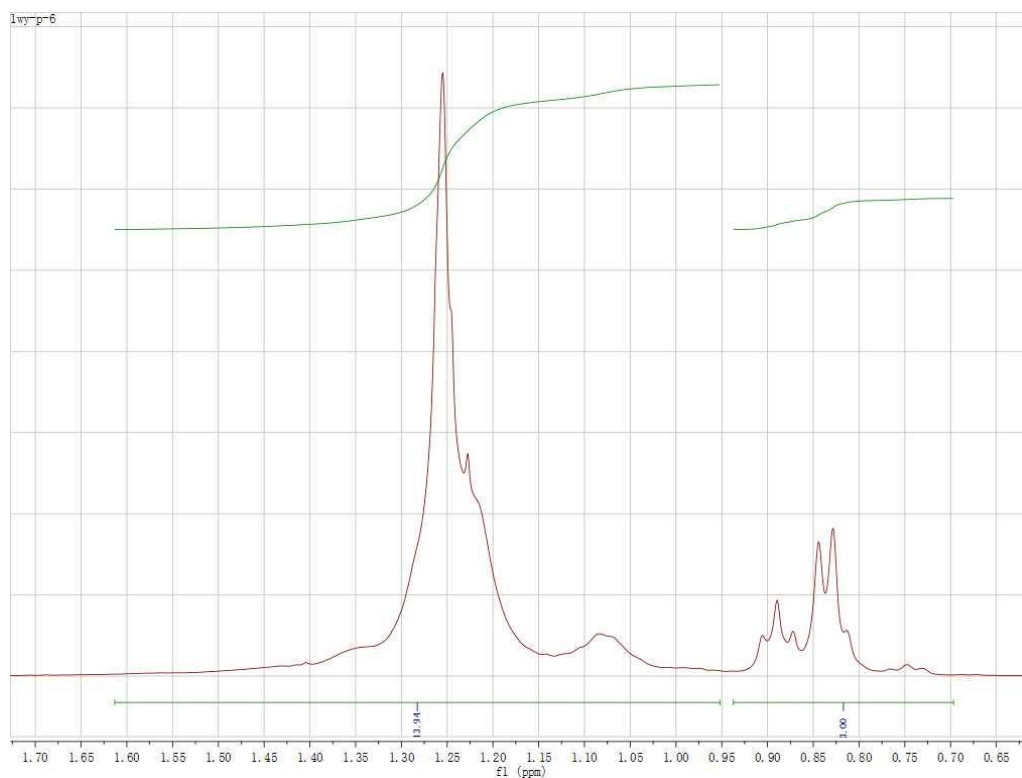

**Fig. S17.**  $^1\text{H}$  NMR spectrum of poly(1-hexene) obtained by complex **3** at 40 °C from **Table 2**, entry 10 ( $d^6$ -benzene, 60 °C, B = 118.1).

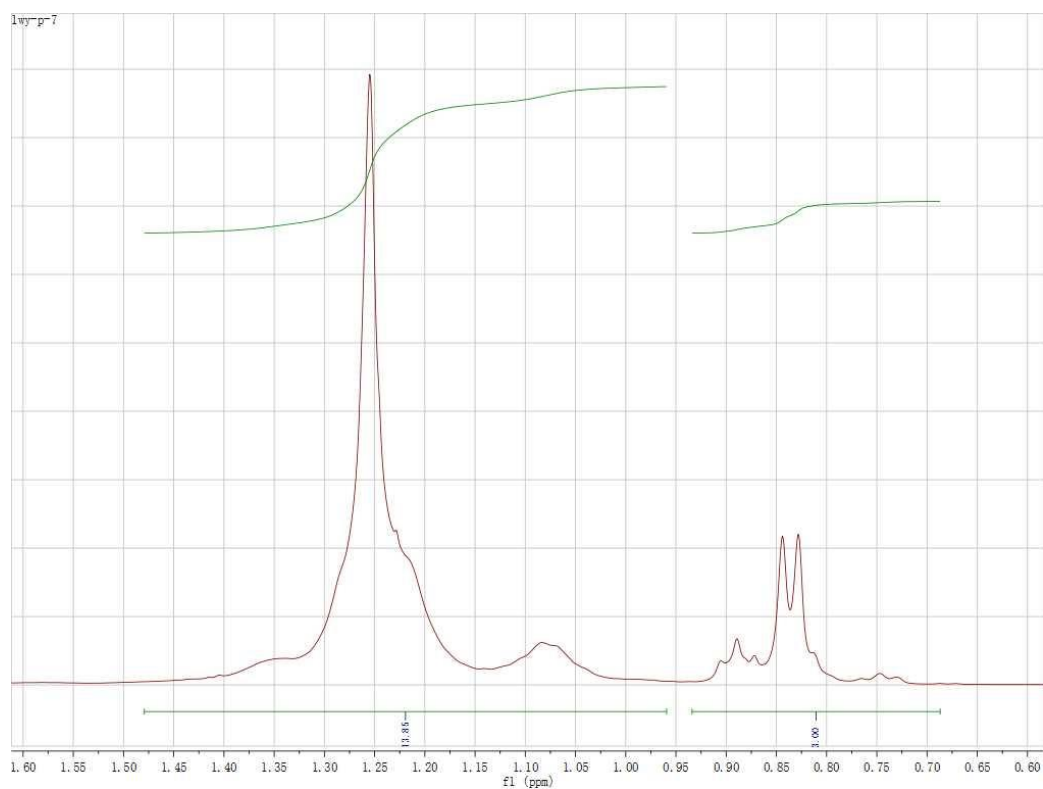

**Fig. S18.**  $^1\text{H}$  NMR spectrum of poly(1-hexene) obtained by complex **3** at 60 °C from **Table 2**, entry 11 ( $d^6$ -benzene, 60 °C, B = 118.7).

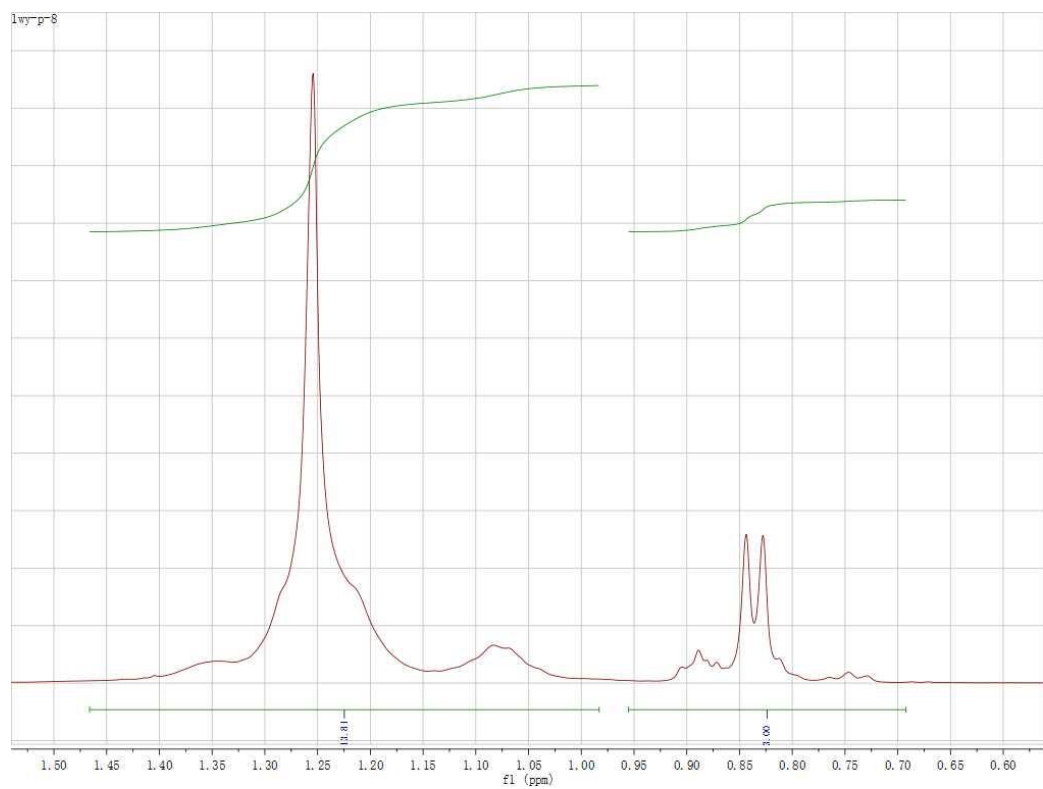

**Fig. S19.**  $^1\text{H}$  NMR spectrum of poly(1-hexene) obtained by complex **3** at 80 °C from **Table 2**, entry 12 ( $d^6$ -benzene, 60 °C, B = 119.0).

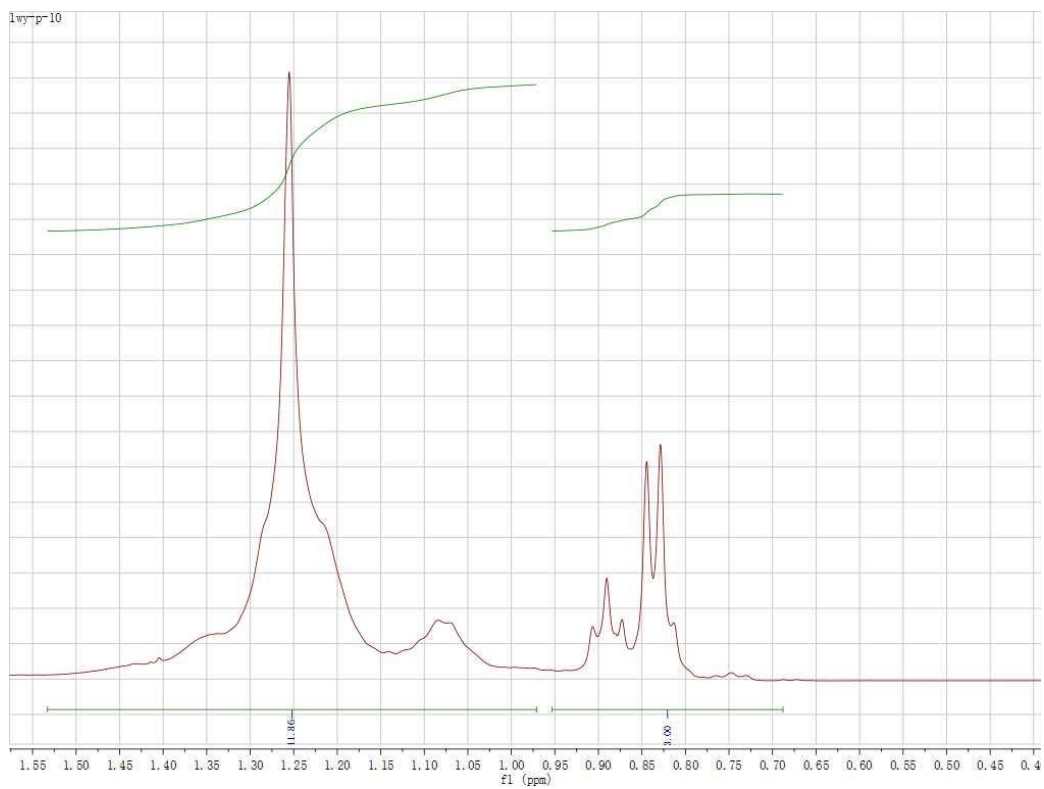

**Fig. S20.** <sup>1</sup>H NMR spectrum of poly(1-hexene) obtained by complex **4** at 40 °C from **Table 2**, entry 14 (d<sup>6</sup>-benzene, 60 °C, B = 134.6).

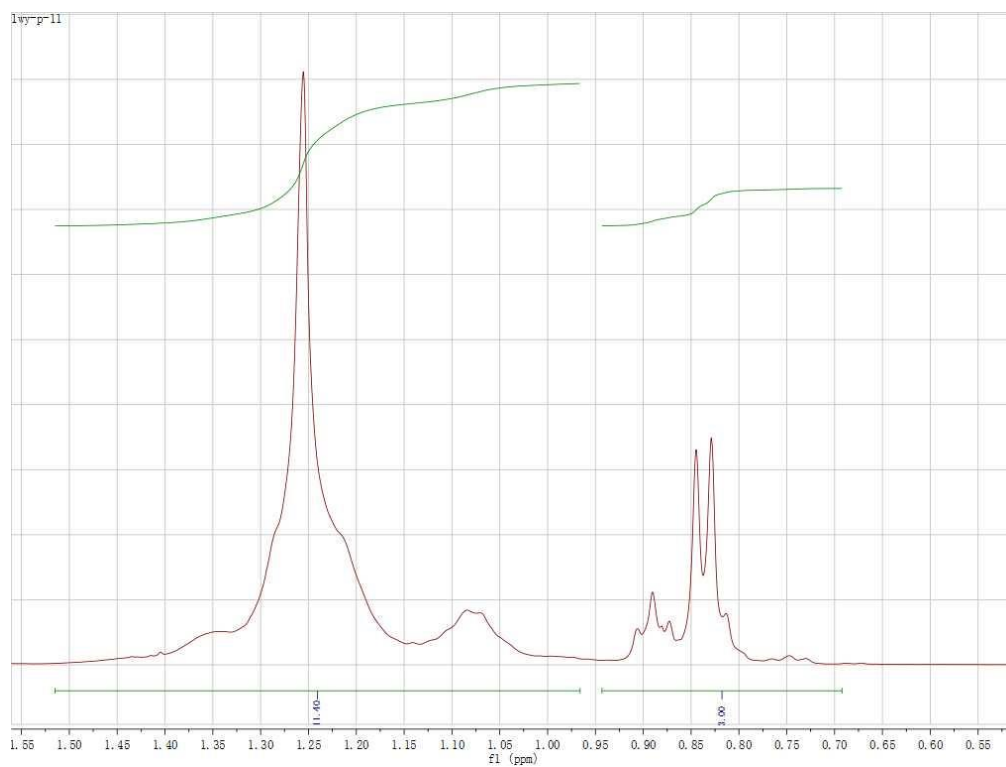

**Fig. S21.** <sup>1</sup>H NMR spectrum of poly(1-hexene) obtained by complex **4** at 60 °C from **Table 2**, entry 15 (d<sup>6</sup>-benzene, 60 °C, B = 138.9).

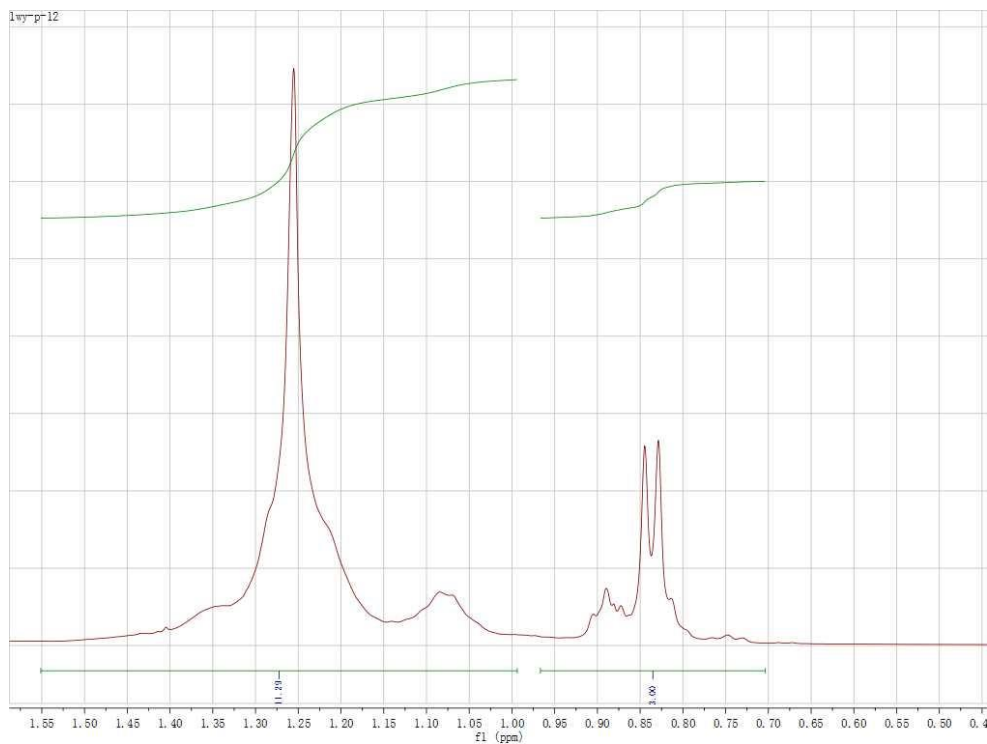

**Fig. S22.**  $^1\text{H}$  NMR spectrum of poly(1-hexene) obtained by complex **4** at 80 °C from **Table 2**, entry 16 ( $d^6$ -benzene, 60 °C, B = 140.0).

#### 4. GPC Curves for the Polyethylenes

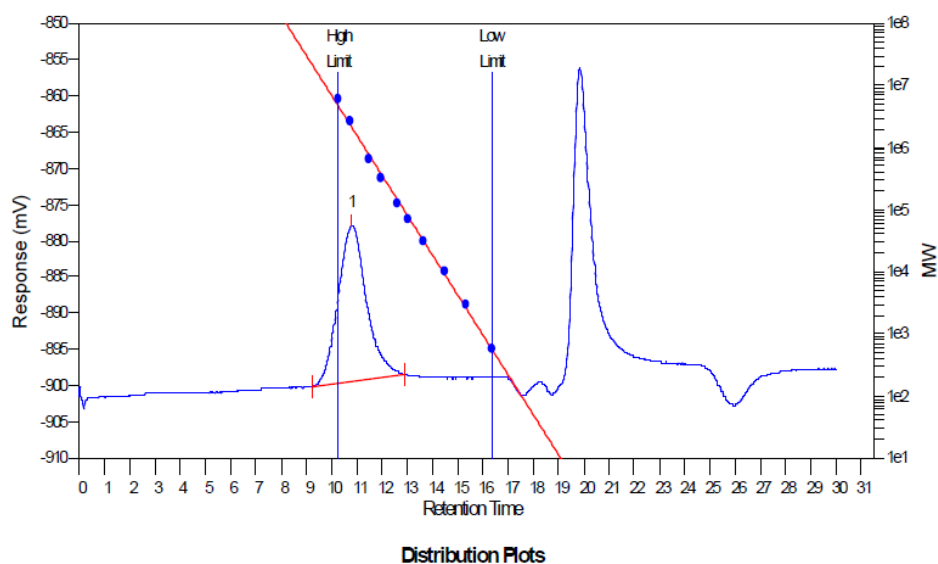

##### MW Averages

| Peak No | Mp      | Mn      | Mw      | Mz      | Mz+1    | Mv      | PD     |
|---------|---------|---------|---------|---------|---------|---------|--------|
| 1       | 2109509 | 1314118 | 2618119 | 4442255 | 6697287 | 2398256 | 1.9923 |

**Fig. S23.** GPC curve for the polyethylene obtained by complex **1** at 50 °C from **Table 1**, entry 2.



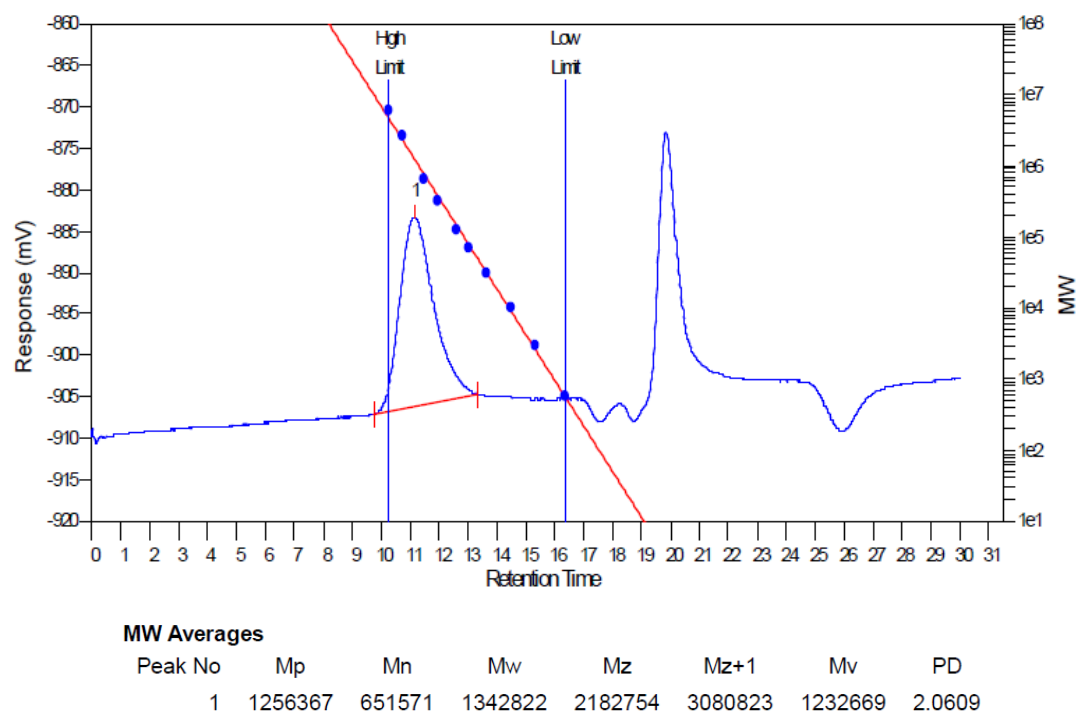

Fig. S24. GPC curve for the polyethylene obtained by complex **3** at 50 °C from **Table 1**, entry 8.

## 5. References

- [1] J. L. Rhinehart, L. A. Brown and B. K. Long, A robust Ni(II)  $\alpha$ -diimine catalyst for high temperature ethylene polymerization. *J. Am. Chem. Soc.* **2013**, *135*, 16316–16319.
- [2] L. H. Guo, S. Y. Dai, C. L. Chen, Investigations of the ligand electronic effects on  $\alpha$ -diimine nickel(II) catalyzed ethylene polymerization. *Polymers* **2016**, *8*, 37.
- [3] F. Z. Wang, J. C. Yuan, F. Y. Song, J. Li, Z. Jia and B. N. Yuan, New chiral-diimine nickel(II) complexes bearing *ortho-sec*-phenethyl groups for ethylene polymerization. *Appl. Organomet. Chem.* **2013**, *27*, 319–327.
- [4] S. Y. Dai, S. X. Zhou, W. Zhang and C. L. Chen, Systematic investigations of ligand steric effects on  $\alpha$ -diimine palladium catalyzed olefin polymerization and copolymerization. *Macromolecules* **2016**, *49*, 8855–8862.
- [5] J. C. Jenkins and M. Brookhart, A highly active anilino-perinaphthenone-based neutral nickel(II) catalyst for ethylene polymerization. *Organometallics* **2003**, *22*, 250–256.
- [6] J. D. Azoulay, G. C. Bazan and G. B. Galland, Microstructural characterization of poly(1-hexene) obtained using a nickel  $\alpha$ -Keto- $\beta$ -diimine initiator. *Macromolecules* **2010**, *43*, 2794–2800.
